# Supplementary material for: Toxic Epidermal Necrolysis (TEN)/Stevens-Johnson Syndrome (SJS) Epidemiology and Mortality Rate at King Fahad Specialist Hospital (KFSH) in Qassim Region of Saudi Arabia: A Retrospective Study
Source: Hindawi journal article supplement (doi:10.1155/2020/7524726), 2020-10-09
Supplement: f1 [file 7524726.f1.pdf]

1

### Toxic Epidermal Necrolysis (TEN)/Steven Johnson Syndrome (SJS) Epidemiology and Mortality Rate in KFSH

2013  
2

|                              |                                |                                                |                                             |
|------------------------------|--------------------------------|------------------------------------------------|---------------------------------------------|
| Patient name                 | [REDACTED]                     |                                                |                                             |
| File NO.                     | [REDACTED]                     |                                                |                                             |
| Gender                       | MALE { }                       | FEMALE { <input checked="" type="checkbox"/> } |                                             |
| Diagnosis                    | SJS { }                        | SJS/TEN { }                                    | TEN { <input checked="" type="checkbox"/> } |
| Year of Diagnosis            | 2013-1439 H                    | Age                                            | 35 yr                                       |
| Causative agents             | DRUG { }<br>.....AMOX.....     | Other                                          |                                             |
| Management                   | supportive only                |                                                |                                             |
| Duration of stay in hospital | 6d                             |                                                |                                             |
| Mortality outcome            | <input type="checkbox"/> Alive | <input checked="" type="checkbox"/> Died       |                                             |

because of sepsis

| Extra Info           |                                              |                               |                                                                        |
|----------------------|----------------------------------------------|-------------------------------|------------------------------------------------------------------------|
| Co - Morbidities     | -                                            | Readmission                   |                                                                        |
| Treatment outcome    | <input type="checkbox"/> Excellent           | <input type="checkbox"/> Good | <input type="checkbox"/> Fair <input checked="" type="checkbox"/> Poor |
| Notes about the file | 100% skin loss died of sepsis came late from |                               |                                                                        |
| Data Entry Date      | Arabic hospital after about 10d              |                               |                                                                        |

18-3 → admit  
23-3- → discharge

2

Toxic Epidermal Necrolysis (TEN)/Steven Johnson Syndrome (SJS)  
Epidemiology and Mortality Rate in KFSH

2016

|                              |                                                                         |              |           |
|------------------------------|-------------------------------------------------------------------------|--------------|-----------|
| Patient name                 | [REDACTED]                                                              |              |           |
| File NO.                     | 1435312                                                                 |              |           |
| Gender                       | MALE { }                                                                | FEMALE { 4 } |           |
| Diagnosis                    | SJS { }                                                                 | SJS/TEN { }  | TEN { 4 } |
| Year of Diagnosis            | 21<br>16/3/14                                                           | Age          | 16        |
| Causative agents             | DRUG { }<br>Amoxiclav<br>(Augmentin)                                    | Other        |           |
| Management                   | IVIG + Supportive<br>plasma pheresis                                    |              |           |
| Duration of stay in hospital | 20d                                                                     |              |           |
| Mortality outcome            | <input checked="" type="checkbox"/> Alive <input type="checkbox"/> Died |              |           |

| Extra Info           |                                                                                                                                         |
|----------------------|-----------------------------------------------------------------------------------------------------------------------------------------|
| Co - Morbidities     | -                                                                                                                                       |
| Treatment outcome    | <input type="checkbox"/> Excellent <input checked="" type="checkbox"/> Good <input type="checkbox"/> Fair <input type="checkbox"/> Poor |
| Notes about the file | complic: Symmetric peripheral gangrene                                                                                                  |
| Data Entry Date      | 2/1/2020                                                                                                                                |

30/3/2016 adm

3

### Toxic Epidermal Necrolysis (TEN)/Steven Johnson Syndrome (SJS) Epidemiology and Mortality Rate in KFSH

|                              |                                                                         |             |                                         |
|------------------------------|-------------------------------------------------------------------------|-------------|-----------------------------------------|
| Patient name                 | [REDACTED]                                                              |             |                                         |
| File NO.                     | [REDACTED]                                                              |             |                                         |
| Gender                       | MALE <input checked="" type="checkbox"/>                                | FEMALE { }  |                                         |
| Diagnosis                    | SJS { }                                                                 | SJS/TEN { } | TEN <input checked="" type="checkbox"/> |
| Year of Diagnosis            | 30/10/2015                                                              | Age         | 42 Y.O                                  |
| Causative agents             | DRUG <input checked="" type="checkbox"/><br>amoxicillin.....            | Other       |                                         |
| Management                   | IV immunoglobulin + Supportive Care                                     |             |                                         |
| Duration of stay in hospital | 19 days                                                                 |             |                                         |
| Mortality outcome            | <input checked="" type="checkbox"/> Alive <input type="checkbox"/> Died |             |                                         |

| Extra Info           |                                               |                               |                                                             |
|----------------------|-----------------------------------------------|-------------------------------|-------------------------------------------------------------|
| Co - Morbidities     | Bronchial A.                                  | Readmission                   | NO only once                                                |
| Treatment outcome    | <input checked="" type="checkbox"/> Excellent | <input type="checkbox"/> Good | <input type="checkbox"/> Fair <input type="checkbox"/> Poor |
| Notes about the file |                                               |                               |                                                             |
| Data Entry Date      | 2/1/2020                                      |                               |                                                             |

ads 17/1/1937  
5/2/1937

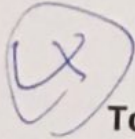

## Toxic Epidermal Necrolysis (TEN)/Steven Johnson Syndrome (SJS) Epidemiology and Mortality Rate in KFSH

|                              |                                                                         |                                                |                                  |
|------------------------------|-------------------------------------------------------------------------|------------------------------------------------|----------------------------------|
| Patient name                 | [REDACTED]                                                              |                                                |                                  |
| File NO.                     | [REDACTED]                                                              |                                                |                                  |
| Gender                       | MALE { <input checked="" type="checkbox"/> }                            | FEMALE { <input checked="" type="checkbox"/> } |                                  |
| Diagnosis                    | SJS { <input checked="" type="checkbox"/> }                             | SJS/TEN { <input type="checkbox"/> }           | TEN { <input type="checkbox"/> } |
| Year of Diagnosis            | 5/1/2015                                                                | Age                                            | 43 y.o                           |
| Causative agents             | DRUG { <input checked="" type="checkbox"/> }<br>paracetamol -           | Other<br>food<br>(cheese)                      |                                  |
| Management                   | IVIg + supportive care + oral prednisolone (CS)                         |                                                |                                  |
| Duration of stay in hospital | 7 days                                                                  |                                                |                                  |
| Mortality outcome            | <input checked="" type="checkbox"/> Alive <input type="checkbox"/> Died |                                                |                                  |

| Extra Info           |                                               |                               |                                                             |
|----------------------|-----------------------------------------------|-------------------------------|-------------------------------------------------------------|
| Co - Morbidities     | -                                             | Readmission                   | -                                                           |
| Treatment outcome    | <input checked="" type="checkbox"/> Excellent | <input type="checkbox"/> Good | <input type="checkbox"/> Fair <input type="checkbox"/> Poor |
| Notes about the file |                                               |                               |                                                             |
| Data Entry Date      | 2/1/2020                                      |                               |                                                             |

Dis 24 3 36  
29/3/36

Toxic Epidermal Necrolysis (TEN)/Steven Johnson Syndrome (SJS)  
Epidemiology and Mortality Rate in KFSH

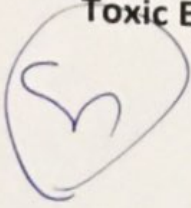

|                              |                                                                         |             |         |
|------------------------------|-------------------------------------------------------------------------|-------------|---------|
| Patient name                 | [REDACTED]                                                              |             |         |
| File NO.                     | [REDACTED]                                                              |             |         |
| Gender                       | MALE { <input checked="" type="checkbox"/> }                            | FEMALE { }  |         |
| Diagnosis                    | SJS { <input checked="" type="checkbox"/> }                             | SJS/TEN { } | TEN { } |
| Year of Diagnosis            | 13/10/2015                                                              | Age         | 17      |
| Causative agents             | DRUG { <input checked="" type="checkbox"/> }<br>...unknown.....         | Other       |         |
| Management                   | - oral prednisolone + supportive care                                   |             |         |
| Duration of stay in hospital | 3 days                                                                  |             |         |
| Mortality outcome            | <input checked="" type="checkbox"/> Alive <input type="checkbox"/> Died |             |         |

| Extra Info           |                                               |                               |                                                             |
|----------------------|-----------------------------------------------|-------------------------------|-------------------------------------------------------------|
| Co - Morbidities     | -                                             |                               | Readmission                                                 |
| Treatment outcome    | <input checked="" type="checkbox"/> Excellent | <input type="checkbox"/> Good | <input type="checkbox"/> Fair <input type="checkbox"/> Poor |
| Notes about the file |                                               |                               |                                                             |
| Data Entry Date      | 2/1/2020                                      |                               |                                                             |

Dis 29/12  
2/1/37

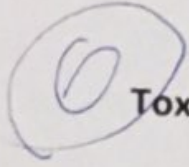

**Toxic Epidermal Necrolysis (TEN)/Steven Johnson Syndrome (SJS)  
Epidemiology and Mortality Rate in KFSH**

2017

|                              |                                                                         |             |         |
|------------------------------|-------------------------------------------------------------------------|-------------|---------|
| Patient name                 | [REDACTED]                                                              |             |         |
| File NO.                     | [REDACTED]                                                              |             |         |
| Gender                       | MALE { 4 }                                                              | FEMALE { }  |         |
| Diagnosis                    | SJS { 4 }                                                               | SJS/TEN { } | TEN { } |
| Year of Diagnosis            | 9/6/38H                                                                 | Age         | 26      |
| Causative agents             | DRUG { }<br>.....9Zitib...amycin..                                      | Other       |         |
| Management                   | oral prednisolone<br>+ supportive                                       |             |         |
| Duration of stay in hospital | 4 d                                                                     |             |         |
| Mortality outcome            | <input checked="" type="checkbox"/> Alive <input type="checkbox"/> Died |             |         |

|                      |                                               |                               |                                                             |
|----------------------|-----------------------------------------------|-------------------------------|-------------------------------------------------------------|
| Extra Info           |                                               |                               |                                                             |
| Co - Morbidities     | -                                             | Readmission                   |                                                             |
| Treatment outcome    | <input checked="" type="checkbox"/> Excellent | <input type="checkbox"/> Good | <input type="checkbox"/> Fair <input type="checkbox"/> Poor |
| Notes about the file |                                               |                               |                                                             |
| Data Entry Date      | 2-1-2020                                      |                               |                                                             |

7

## Toxic Epidermal Necrolysis (TEN)/Steven Johnson Syndrome (SJS) Epidemiology and Mortality Rate in KFSH

|                              |                                                                         |                                                |         |
|------------------------------|-------------------------------------------------------------------------|------------------------------------------------|---------|
| Patient name                 | [REDACTED]                                                              |                                                |         |
| File NO.                     | [REDACTED]                                                              |                                                |         |
| Gender                       | MALE { }                                                                | FEMALE { <input checked="" type="checkbox"/> } |         |
| Diagnosis                    | SJS { <input checked="" type="checkbox"/> }                             | SJS/TEN { }                                    | TEN { } |
| Year of Diagnosis            | 20/12/18 39 Y                                                           | Age                                            | 74 Y    |
| Causative agents             | DRUG { <input checked="" type="checkbox"/> }                            | Other                                          |         |
|                              | Ciprofloxacin...                                                        |                                                |         |
| Management                   | Supportive care                                                         |                                                |         |
| Duration of stay in hospital | 5 days                                                                  |                                                |         |
| Mortality outcome            | <input checked="" type="checkbox"/> Alive <input type="checkbox"/> Died |                                                |         |

2018 ←

| Extra Info           |                                               |                               |                                                             |
|----------------------|-----------------------------------------------|-------------------------------|-------------------------------------------------------------|
| Co - Morbidities     | HTN, PE<br>CVA                                | Readmission                   | X                                                           |
| Treatment outcome    | <input checked="" type="checkbox"/> Excellent | <input type="checkbox"/> Good | <input type="checkbox"/> Fair <input type="checkbox"/> Poor |
| Notes about the file |                                               |                               |                                                             |
| Data Entry Date      | 2/1/2020                                      |                               |                                                             |

2

## Toxic Epidermal Necrolysis (TEN)/Steven Johnson Syndrome (SJS) Epidemiology and Mortality Rate in KFSH

2019 A

|                              |                                                                         |                                                |                                             |
|------------------------------|-------------------------------------------------------------------------|------------------------------------------------|---------------------------------------------|
| Patient name                 | [REDACTED]                                                              |                                                |                                             |
| File NO.                     | 1328294                                                                 |                                                |                                             |
| Gender                       | MALE { }                                                                | FEMALE { <input checked="" type="checkbox"/> } |                                             |
| Diagnosis                    | SJS { }                                                                 | SJS/TEN { }                                    | TEN { <input checked="" type="checkbox"/> } |
|                              |                                                                         |                                                |                                             |
| Year of Diagnosis            | 16-7-40H                                                                | Age                                            | 45 Y                                        |
| Causative agents             | DRUG { }                                                                | Other                                          |                                             |
|                              | le. e. e. tri. act. m                                                   |                                                |                                             |
| Management                   | IVIG + oral steroid and supportive                                      |                                                |                                             |
| Duration of stay in hospital | 6d                                                                      |                                                |                                             |
| Mortality outcome            | <input checked="" type="checkbox"/> Alive <input type="checkbox"/> Died |                                                |                                             |

|                      |                                               |                               |                                                             |
|----------------------|-----------------------------------------------|-------------------------------|-------------------------------------------------------------|
| Extra Info           |                                               | coronary heart disease        |                                                             |
| Co - Morbidities     | Epilepsy<br>HIV<br>hypertension               | Readmission                   |                                                             |
| Treatment outcome    | <input checked="" type="checkbox"/> Excellent | <input type="checkbox"/> Good | <input type="checkbox"/> Fair <input type="checkbox"/> Poor |
| Notes about the file |                                               |                               |                                                             |
| Data Entry Date      |                                               |                               |                                                             |

16-7-40H

21-7-40H



5

## Toxic Epidermal Necrolysis (TEN)/Steven Johnson Syndrome (SJS) Epidemiology and Mortality Rate in KFSH

|                              |                                                                                                            |                                      |                                             |
|------------------------------|------------------------------------------------------------------------------------------------------------|--------------------------------------|---------------------------------------------|
| Patient name                 | [REDACTED]                                                                                                 |                                      |                                             |
| File NO.                     | [REDACTED]                                                                                                 |                                      |                                             |
| Gender                       | MALE { <input checked="" type="checkbox"/> }                                                               | FEMALE { <input type="checkbox"/> }  |                                             |
| Diagnosis                    | SJS { <input type="checkbox"/> }                                                                           | SJS/TEN { <input type="checkbox"/> } | TEN { <input checked="" type="checkbox"/> } |
| Year of Diagnosis            | 30/12/2014                                                                                                 | Age                                  | 20                                          |
| Causative agents             | DRUG { <input checked="" type="checkbox"/> }                                                               | Other                                |                                             |
|                              | Carbamazepin<br>(teyretol)                                                                                 |                                      |                                             |
| Management                   | IVIG + supportiv care<br>(topical skin care, nutritional care & prevention<br>of 2ry infection + eye care) |                                      |                                             |
| Duration of stay in hospital | 4 day                                                                                                      |                                      |                                             |
| Mortality outcome            | by AOX <input checked="" type="checkbox"/> Alive <input type="checkbox"/> Died                             |                                      |                                             |

| Extra Info           |                                                                                                                                         |             |  |
|----------------------|-----------------------------------------------------------------------------------------------------------------------------------------|-------------|--|
| Co - Morbidities     | epelipsy                                                                                                                                | Readmission |  |
| Treatment outcome    | <input checked="" type="checkbox"/> Excellent <input type="checkbox"/> Good <input type="checkbox"/> Fair <input type="checkbox"/> Poor |             |  |
| Notes about the file |                                                                                                                                         |             |  |
| Data Entry Date      | 2/1/2020                                                                                                                                |             |  |

ad 30/12  
Dis

8/3/1436  
22/3/ 36

10

### Toxic Epidermal Necrolysis (TEN)/Steven Johnson Syndrome (SJS) Epidemiology and Mortality Rate in KFSH

|                              |                                                                                |                                                |                                             |
|------------------------------|--------------------------------------------------------------------------------|------------------------------------------------|---------------------------------------------|
| Patient name                 | [REDACTED]                                                                     |                                                |                                             |
| File NO.                     | [REDACTED]                                                                     |                                                |                                             |
| Gender                       | MALE { }                                                                       | FEMALE { <input checked="" type="checkbox"/> } |                                             |
| Diagnosis                    | SJS { }                                                                        | SJS/TEN { }                                    | TEN { <input checked="" type="checkbox"/> } |
| Year of Diagnosis            | 29/5/2018                                                                      | Age                                            | 62 Y.O                                      |
| Causative agents             | DRUG { <input checked="" type="checkbox"/> }<br>Carbamazepine...<br>(tegretol) | Other                                          | -                                           |
| Management                   | IV IG + supportive care                                                        |                                                |                                             |
| Duration of stay in hospital | 8 days                                                                         |                                                |                                             |
| Mortality outcome            | <input checked="" type="checkbox"/> Alive <input type="checkbox"/> Died        |                                                |                                             |

| Extra Info           |                                               |                               |                                                             |
|----------------------|-----------------------------------------------|-------------------------------|-------------------------------------------------------------|
| Co - Morbidities     | BA, HTN                                       | Readmission                   | -                                                           |
| Treatment outcome    | <input checked="" type="checkbox"/> Excellent | <input type="checkbox"/> Good | <input type="checkbox"/> Fair <input type="checkbox"/> Poor |
| Notes about the file |                                               |                               |                                                             |
| Data Entry Date      | 2/1/2020                                      |                               |                                                             |

ad 14/9/39  
22/9/39
